# Supplementary material for: Lower Levels of ABO Anti-A and Anti-B of IgM, IgG and IgA Isotypes in the Serum but Not the Saliva of COVID-19 Convalescents
Source: MDPI journal article supplement (doi:10.3390/jcm11154513), 2022-08-02
Supplement: s1 [file s1]

## Supplemental data

**Table S1.** Anti-A and anti-B levels in the saliva of COVID-19 convalescents and controls

| Anti-A        | ABO blood type | Visit   | COVID-19 convalescents |                  | N  | Saliva controls  |
|---------------|----------------|---------|------------------------|------------------|----|------------------|
|               |                |         | N                      | Median (Q1, Q3)  |    | Median (Q1, Q3)  |
| IgM           | B              | Visit 1 | 15                     | 1.8 (1.3, 2.8)   | 22 | 2.3 (1.9, 4.3)   |
| IgM           | B              | Visit 2 | 15                     | 1.3 (1, 2.1)     | 5  | 2.1 (1.8, 2.5)   |
| IgM           | O              | Visit 1 | 56                     | 3.8 (2.1, 5.8)   | 58 | 3.3 (1.9, 6.2)   |
| IgM           | O              | Visit 2 | 49                     | 2.6 (1.8, 4.6)   | 11 | 2.4 (1.7, 5)     |
| IgG           | B              | Visit 1 | 15                     | 1 (0.9, 1.1)     | 22 | 1 (1, 1.1)       |
| IgG           | B              | Visit 2 | 15                     | 1 (0.9, 1.1)     | 5  | 1 (1, 1.1)       |
| IgG           | O              | Visit 1 | 56                     | 1.2 (1, 1.6)     | 58 | 1.2 (1, 1.6)     |
| IgG           | O              | Visit 2 | 49                     | 1.1 (0.9, 1.6)   | 11 | 1.2 (1, 2.6)     |
| IgA           | B              | Visit 1 | 15                     | 5 (3.5, 9.4)     | 22 | 4.8 (3.2, 12.5)  |
| IgA           | B              | Visit 2 | 15                     | 4.1 (2.5, 5.9)   | 5  | 14.4 (3.8, 15.6) |
| IgA           | O              | Visit 1 | 56                     | 15.7 (7.3, 34)   | 58 | 14.4 (6.8, 35.5) |
| IgA           | O              | Visit 2 | 49                     | 12.9 (7.7, 25.7) | 11 | 12.8 (9.2, 20.1) |
| <b>Anti-B</b> |                |         |                        |                  |    |                  |
| IgM           | A              | Visit 1 | 70                     | 3.4 (2.3, 5.4)   | 66 | 3.1 (2.2, 4.6)   |
| IgM           | A              | Visit 2 | 55                     | 2.4 (1.7, 5.3)   | 9  | 3.6 (1.6, 5.1)   |
| IgM           | O              | Visit 1 | 56                     | 4 (2.3, 6.3)     | 58 | 3.6 (2.3, 6.2)   |
| IgM           | O              | Visit 2 | 47                     | 3.7 (2.2, 5.4)   | 11 | 3.4 (1.8, 4.3)   |
| IgG           | A              | Visit 1 | 70                     | 0.9 (0.8, 1)     | 66 | 1 (0.9, 1.1)     |
| IgG           | A              | Visit 2 | 55                     | 0.9 (0.7, 0.9)   | 9  | 1.1 (1, 1.1)     |
| IgG           | O              | Visit 1 | 56                     | 1 (0.9, 1.2)     | 58 | 1 (0.9, 1.3)     |
| IgG           | O              | Visit 2 | 47                     | 1 (0.9, 1.1)     | 11 | 1.2 (0.9, 1.3)   |
| IgA           | A              | Visit 1 | 70                     | 3.2 (1.8, 5.9)   | 66 | 2 (1.3, 4.9)     |
| IgA           | A              | Visit 2 | 55                     | 2.7 (1.7, 5)     | 9  | 2.2 (1.1, 3.4)   |
| IgA           | O              | Visit 1 | 56                     | 12.1 (6, 29.2)   | 58 | 13.1 (4.9, 39.5) |
| IgA           | O              | Visit 2 | 47                     | 10.5 (8, 25.7)   | 11 | 9.8 (5.8, 45.4)  |

N, number of individuals; Interquartile range: Q1, first quartile and Q3, third quartile

**Table S2.** Results of multiple regression models investigating the effect of age, sex, blood type and group on anti-A/B levels in the saliva of COVID-19 convalescents and controls

| Anti-A level           | Estimate | 95% CI         | P       |
|------------------------|----------|----------------|---------|
| Age                    | 0.002    | (-0.005;0.009) | 0.523   |
| Sex: Male              | -0.2     | (-0.37;-0.03)  | 0.02    |
| ABO blood type: O      | 0.36     | (0.17;0.54)    | < 0.001 |
| Group: Saliva controls | 0.06     | (-0.12;0.23)   | 0.525   |
| <b>Anti-B level</b>    |          |                |         |
| Age                    | 0.003    | (-0.003;0.008) | 0.34    |
| Sex: Male              | -0.16    | (-0.29;-0.02)  | 0.021   |
| Blood group: O         | 0.66     | (0.53;0.79)    | < 0.001 |
| Group: Saliva controls | -0.07    | (-0.2;0.07)    | 0.338   |

CI, confidence interval; No significant differences between the study samples of the COVID-19 convalescents and the controls were found.

Table S3. Study participants exhibiting high anti-A/anti-B levels compared to other participants

| Group                  | ABO<br>blood type | Sex    | Age | Specimen | Antibody<br>class | Anti-A level<br>visit 1 | Anti-A level<br>visit 2 | Anti-B level<br>visit 1 | Anti-B level<br>visit 2 |
|------------------------|-------------------|--------|-----|----------|-------------------|-------------------------|-------------------------|-------------------------|-------------------------|
| COVID-19 convalescent* | O                 | Female | 41  | Saliva   | IgA               | 49.0                    | 32.6                    | 137.9                   | 153.4                   |
| COVID-19 convalescent* | O                 | Female | 41  | Serum    | IgA               | 14.8                    | 14.0                    | 216.3                   | 171.4                   |
| COVID-19 convalescent  | O                 | Female | 52  | Saliva   | IgA               | 151.7                   | 144.1                   | 65.6                    | 87.3                    |
| COVID-19 convalescent  | A                 | Female | 36  | Saliva   | IgA               | 0.3                     | 0.9                     | 142.4                   | 145.0                   |
| Control                | O                 | Female | 45  | Serum    | IgA               | 117.1                   | 2.2                     | 653.2                   | 1.6                     |
| Control                | O                 | Female | 32  | Serum    | IgM               | 76.8                    | 321.2                   | 15.2                    | 24.5                    |
| Control                | A                 | Male   | 40  | Serum    | IgM               | 1.1                     | 1.0                     | 117.9                   | 161.6                   |
| Control                | A                 | Female | 36  | Serum    | IgM               | 1.3                     | 1.2                     | 206.3                   | 193.1                   |
| Control                | A                 | Female | 41  | Serum    | IgA               | 1.3                     | 1.3                     | 149.9                   | 164.9                   |
| Control                | A                 | Female | 45  | Serum    | IgM               | 0.9                     | 0.9                     | 19.1                    | 233.2                   |
| Control                | A                 | Male   | 21  | Serum    | IgM               | 1.1                     | 1.1                     | 107.8                   | 143.8                   |
| Control                | O                 | Female | 42  | Serum    | IgA               | 9.5                     | 8.7                     | 349.0                   | 312.0                   |
| Control                | A                 | Male   | 59  | Serum    | IgM               | 1.1                     | 1.0                     | 178.7                   | 152.2                   |
| Control                | O                 | Male   | 29  | Serum    | IgM               | 51.1                    | 43.9                    | 177.2                   | 151.8                   |
| Control                | O                 | Female | 29  | Serum    | IgM               | 277.2                   | 240.0                   | 78.2                    | 65.1                    |
| Control                | O                 | Female | 29  | Serum    | IgM               | 180.9                   | 273.8                   | 52.5                    | 61.1                    |
| Control                | O                 | Male   | 42  | Serum    | IgA               | 10.9                    | 10.6                    | 147.6                   | 143.9                   |
| Control                | A                 | Male   | 30  | Serum    | IgM               | 0.9                     | 2.5                     | 151.5                   | 165.9                   |
| Control                | A                 | Female | 27  | Serum    | IgM               | 1.1                     | 1.1                     | 142.5                   | 131.5                   |
| Control                | O                 | Female | 38  | Saliva   | IgA               | 101.3                   | NA                      | 450.2                   | NA                      |
| Control                | O                 | Female | 25  | Saliva   | IgA               | 15.6                    | NA                      | 231.6                   | NA                      |
| Control                | O                 | Male   | 28  | Saliva   | IgA               | 45.2                    | NA                      | 249.4                   | NA                      |

ABO antibody levels were measured in serum and saliva samples collected at two time points (visit 1: baseline visit; visit 2: two months later) in individuals who recovered from COVID-19 and in controls who had never been infected with SARS-CoV-2. NA, not available; \*Serum and saliva samples belong to the same participant.

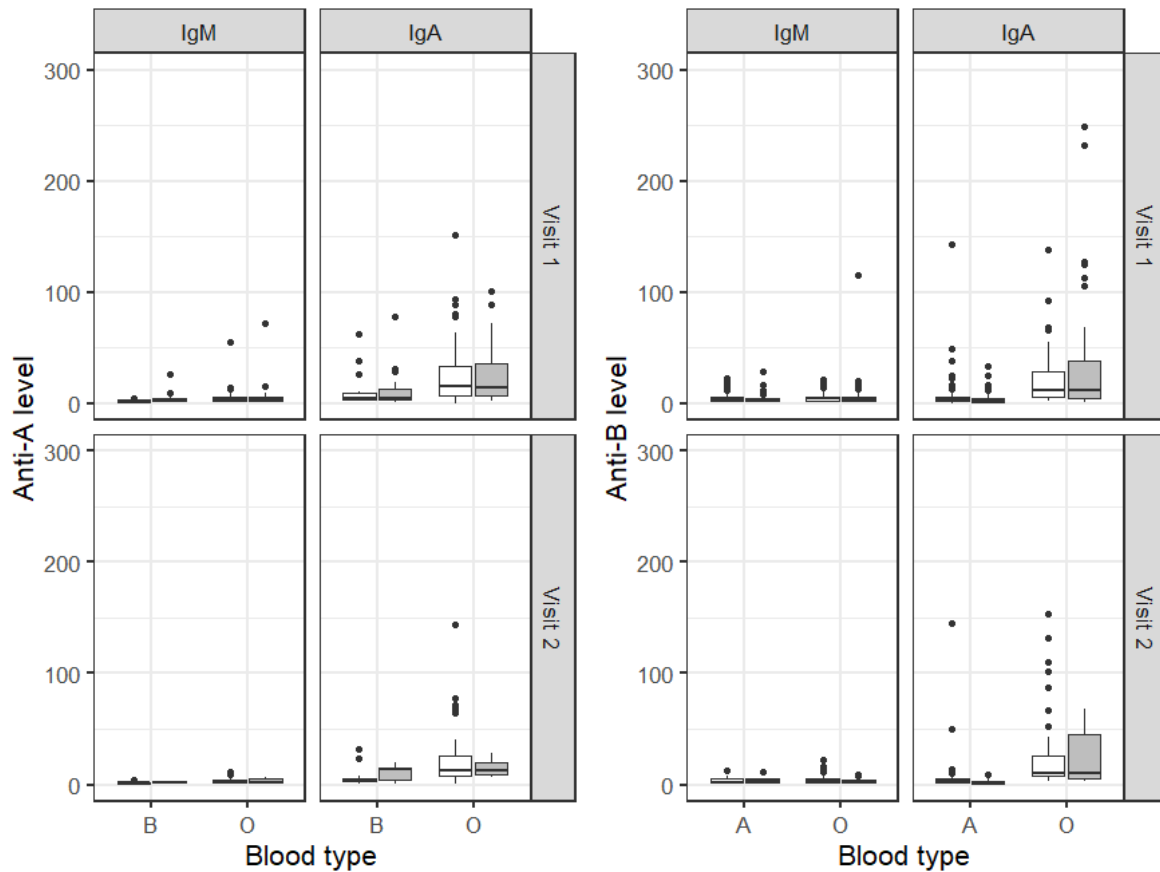

Figure S1.

**Figure S1.** Anti-A and anti-B values in the saliva of COVID-19 convalescents and controls. ABO antibody levels measured at two time points (visit 1: baseline visit and visit 2: two months later) are shown. Participants who recovered from COVID-19 are displayed in white, and healthy blood donors are displayed in gray. Only IgM and IgA are reported because values for IgG were extremely low. There was no significant difference between antibody levels detected in COVID-19 convalescents and controls. Note that one observation with an anti-B level > 400 is not shown in the plot (IgA, visit 1).

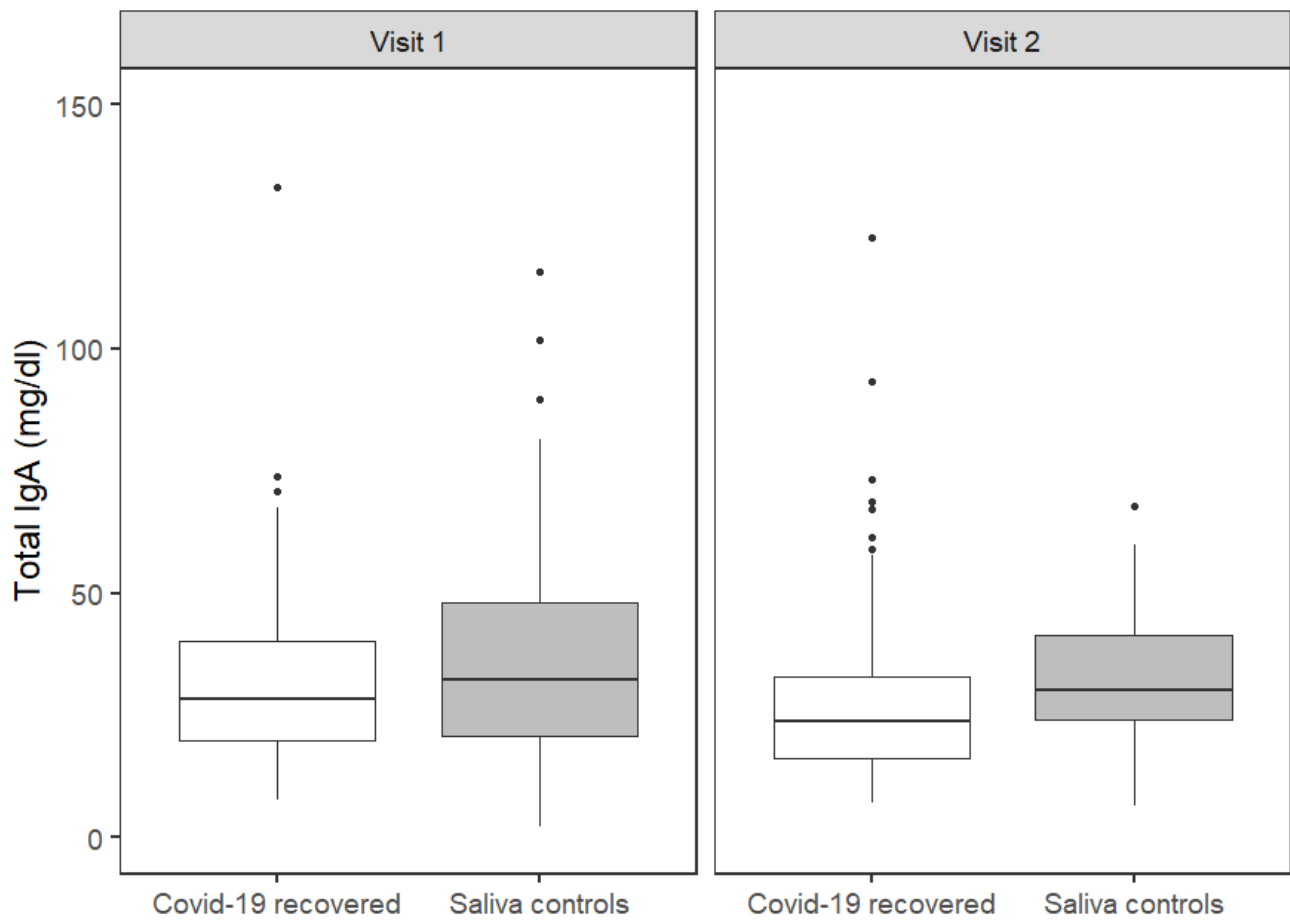

**Figure S2.** Total IgA concentration in saliva of COVID-19 convalescent individuals and controls. Values measured in saliva samples collected at two time points (visit 1: baseline visit and visit 2: two months later) are indicated. Differences were significant at visit 1 [ $p=0.038$  (COVID-19 recovered  $n=126$ , median 28.3, IQR 19.8-40.2; saliva controls:  $n=162$ , median 32.5, IQR 20.7-48.6)], and at visit 2 [ $p=0.027$  (COVID-19 recovered:  $n=120$ , median 23.6, IQR 16.0-32.8; saliva controls:  $n=27$ , median 30.0, IQR 24.1-41.3)]. Note that two observations at visit 1 for saliva controls are not shown (level > 150 mg/dl) and that at visit 2, only 27 of 153 (18%) saliva controls were available for IgA analysis in saliva.
